# Supplementary material for: Structure-Dependent Effects of Bisphosphonates on Inflammatory Responses in Cultured Neonatal Mouse Calvaria
Source: MDPI journal article supplement (doi:10.3390/antiox9060503), 2020-06-09
Supplement: s1 [file s1]

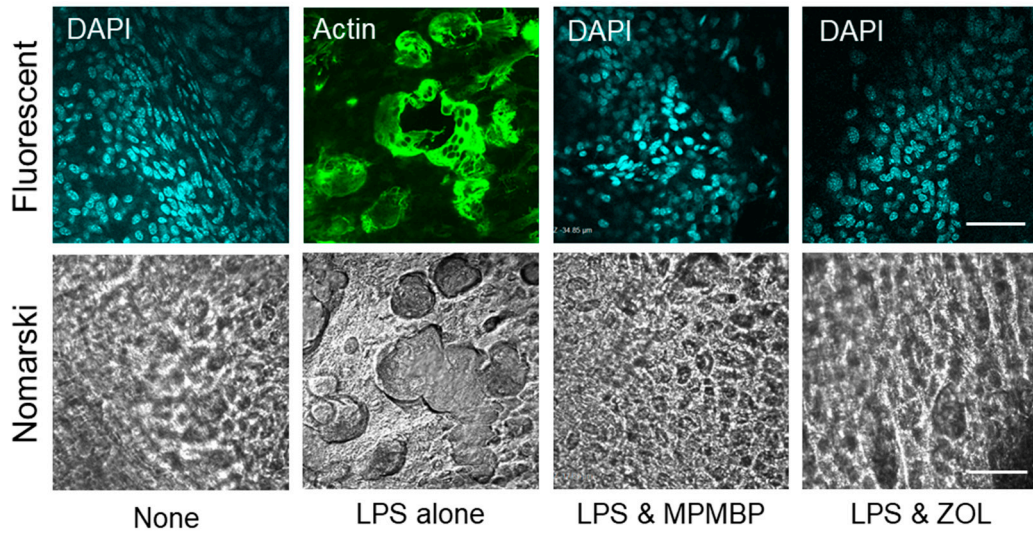

**Figure S1:** Representative confocal microscopy images of fluorescent-stained neonatal mouse calvaria. Parietal bones were incubated with the vehicle, 10  $\mu\text{g}/\text{mL}$  LPS alone, LPS & 125  $\mu\text{M}$  MPMBP or LPS & 25  $\mu\text{M}$  zoledronate for 48 h. Scale bars = 50  $\mu\text{m}$ .
